# Supplementary material
Source: publisher figshare collection journal article supplement (https://geolsoc.figshare.com/ndownloader/files/26674000)
Supplement: Supplementary file 1 [file 26674000]

## Sheet: Sheet1
Analysis	Total Hf (V)	βΗf	βΥb	178Hf/177Hf	2SE	176Lu/177Hf	2SE	176Hf/177Hf	2SE	176Yb/177Hf	176Hf/177Hf (i)	εHf	2SE	Age (Ma)
UN05R1.1	5.73	-1.612	-1.439	1.46748	0.00014	0.00116	3.5e-05	0.282163	9.05105e-05	0.00128481	0.282137	3.47699	3.20915	1175.9
UN05R2.1	8	-1.602	-1.52	1.46741	9.2e-05	0.0006917	9.4e-06	0.282121	7.17769e-05	0.000558663	0.282105	3.67586	2.54527	1235.1
UN05R2.5	5.68	-1.628	-1.434	1.46747	0.00013	0.001371	3.5e-05	0.281884	9.05019e-05	0.0015411	0.281841	3.84094	3.21233	1651.5
UN05R2.7	3.11	-1.659	-1.6	1.46745	0.00016	0.001206	6.3e-05	0.28116	0.000182183	0.00386354	0.2811	-0.0505536	6.48104	2619.4
UN05R2.8	7.46	-1.5947	-1.491	1.4674	6.3e-05	0.001306	1.9e-05	0.282038	7.63967e-05	0.00172942	0.282003	4.62376	2.71033	1435.7
UN05R2.9	7.02	-1.5862	-1.484	1.46734	9.8e-05	0.001052	1.4e-05	0.281686	8.01154e-05	0.000340985	0.281653	-2.98364	2.84362	1644.7
UN05R3.4	6.43	-1.5934	-1.469	1.46743	7.3e-05	0.002294	3.8e-05	0.282732	7.27212e-05	0.00157601	0.28266	32.7685	2.58117	1644.7
UN05R3.5	4.68	-1.6062	-1.47	1.46745	9.3e-05	0.0005771	5e-06	0.281538	8.48094e-05	0.000875197	0.281519	-5.65483	3.01086	1735.8
UN05R3.7	3.232	-1.632	-1.52	1.46733	0.00013	0.0004794	9.7e-06	0.28124	0.000133007	0.000413484	0.281223	-13.5494	4.72319	1849.2
UN05R3.9	6.02	-1.5899	-1.4	1.4674	0.00011	0.000321	1.4e-05	0.281119	8.76315e-05	0.000503523	0.281103	1.32767	3.11783	2673.6
UN05R4.1	4.06	-1.607	-1.54	1.4675	0.00013	0.001238	2.2e-05	0.28099	0.000133002	0.00317682	0.280925	-3.10075	4.73297	2754.6
UN05R4.4	4.929	-1.5983	-1.447	1.46733	9.6e-05	0.0009233	8e-06	0.281919	8.48221e-05	0.000588402	0.281893	1.99223	3.00962	1490.6
UN05R4.5	4.36	-1.602	-1.501	1.46744	0.00019	0.002044	5.3e-05	0.28262	0.000123283	0.00243189	0.282602	3.92461	4.36414	466.21
UN05R4.6	8.44	-1.6032	-1.439	1.46731	6.9e-05	0.0013064	3.7e-06	0.282203	6.63052e-05	0.00114526	0.282178	1.62551	2.35015	1031.37
UN05R4.7	6.54	-1.605	-1.49	1.46738	0.00012	0.0007545	6.9e-06	0.282063	8.57706e-05	0.000774721	0.282044	3.89803	3.04222	1339.7
UN05R4.8	3.14	-1.648	-1.51	1.46757	0.00022	0.00172	0.00014	0.28097	0.000201964	0.0118945	0.280878	-3.90605	7.18764	2791
UN05R4.10	7.66	-1.5857	-1.56	1.46738	8e-05	0.000589	6.4e-06	0.281648	6.80974e-05	0.000402844	0.281626	3.45215	2.41884	1966
UN05R5.2	5.7	-1.5981	-1.441	1.46738	8.8e-05	0.002493	3.3e-05	0.282721	9.72024e-05	0.00274461	0.282698	7.6842	3.44102	481.78
UN05R5.3-1	7.52	-1.604	-1.508	1.46741	0.00013	0.002168	2.7e-05	0.281767	8.85998e-05	0.00250984	0.2817	-1.8827	3.14459	1619.6
UN05R5.4	6.74	-1.5885	-1.443	1.46736	8.7e-05	0.0008745	5.3e-06	0.282144	8.67182e-05	0.000368544	0.282121	8.2477	3.07633	1410.9
UN05R5.6	6.88	-1.6041	-1.465	1.46731	8.2e-05	0.001298	3.8e-05	0.281071	7.6361e-05	0.000937309	0.281001	1.34006	2.71783	2828.5
UN05R5.8	6.47	-1.5871	-1.456	1.46734	8.8e-05	0.00552	0.00023	0.28265	0.000123284	0.0092467	0.2826	4.13529	4.36428	478.19
UN05R5.10	7.13	-1.5953	-1.437	1.46725	8.4e-05	0.001594	2.6e-05	0.28222	6.81211e-05	0.00187217	0.282184	5.54004	2.4154	1193.6
UN05R6.1	7.89	-1.5906	-1.4	1.46736	9.9e-05	0.0005814	3.7e-06	0.282096	6.35986e-05	0.00046046	0.28208	6.81119	2.25616	1410.4
UN05R6.2	6.58	-1.5994	-1.453	1.46719	9.8e-05	0.001603	5.7e-05	0.281566	8.66994e-05	0.00265696	0.281514	-6.29163	3.07782	1716.1
UN05R6.3	6.56	-1.5963	-1.465	1.46724	9.5e-05	0.002719	2.9e-05	0.282699	7.92161e-05	0.00133183	0.282675	6.74675	2.80427	477.59
UN05R6.4	9.31	-1.6014	-1.41	1.46738	7.8e-05	0.0003504	8e-06	0.281006	6.53502e-05	0.000543234	0.280988	-3.52585	2.32491	2640
UN05R6.7	6.51	-1.5998	-1.453	1.4673	7.3e-05	0.000723	1.1e-05	0.282184	7.26999e-05	0.000247384	0.282171	0.241855	2.57651	981.2
UN05R6.10	6.66	-1.6033	-1.34	1.4673	8.6e-05	0.0004037	6.8e-06	0.281628	6.80966e-05	0.000393204	0.281617	-9.10184	2.41585	1433.5
UN05R7.2	6.16	-1.6077	-1.41	1.4672	9.1e-05	0.0003964	3.9e-06	0.281515	7.54487e-05	0.000298643	0.281501	-3.47994	2.6793	1858
UN05R7.3	7.59	-1.6074	-1.45	1.46739	7.9e-05	0.0005417	5.8e-06	0.281704	6.44792e-05	0.000297212	0.281687	-1.22191	2.28876	1669.4
UN05R7.4	6.78	-1.594	-1.514	1.46737	8.3e-05	0.0006235	5.3e-06	0.280964	7.08125e-05	0.000434772	0.28093	0.125595	2.52068	2884.4
UN05R7.5	5.13	-1.591	-1.518	1.46736	9.9e-05	0.001044	2.5e-05	0.282021	9.33614e-05	0.000224448	0.282002	-6.42693	3.30853	950.1
UN05R7.6	6.03	-1.61	-1.452	1.4674	0.00011	0.00492	0.00012	0.282789	9.52927e-05	0.00626394	0.282745	9.22343	3.37338	476.99
UN05R7.7	6.78	-1.592	-1.35	1.4673	0.00012	0.0001297	9.3e-06	0.281036	0.000100989	0.000237113	0.281029	-0.723048	3.59329	2697.3
UN05R8.5	6.86	-1.5932	-1.43	1.4673	8.8e-05	0.000594	2.1e-05	0.28082	8.47856e-05	0.000375525	0.280785	-0.805878	3.01935	3062.8
UN05R9.1	6.02	-1.6075	-1.55	1.46735	9.3e-05	0.0008862	6.2e-06	0.282161	8.57738e-05	0.000842678	0.282142	2.63045	3.04089	1131.12
UN05R9.2	7.02	-1.6078	-1.45	1.46735	9.4e-05	0.000438	1.6e-05	0.281044	7.45041e-05	0.000852103	0.28102	3.60626	2.65216	2895.9
UN05R9.3	7.792	-1.6121	-1.46	1.46729	7.3e-05	0.000599	3.7e-05	0.281328	6.17775e-05	0.00135938	0.281307	-9.85622	2.19393	1880.9
UN05R9.4	7.45	-1.6028	-1.48	1.4673	7.4e-05	0.0002632	4.6e-06	0.2804	6.62287e-05	0.000185324	0.280382	-2.15952	2.36158	3610.2
UN05R9.5	7.21	-1.614	-1.4	1.46733	9.5e-05	0.000776	3.9e-05	0.281046	8.00929e-05	0.000766083	0.281003	2.8478	2.85106	2888.9
UN05R9.6	6.113	-1.5977	-1.524	1.46724	0.0001	0.000941	1.2e-05	0.281988	8.86068e-05	0.000632784	0.281964	1.46291	3.14295	1357.4
UN05R9.7	5.62	-1.622	-1.46	1.46736	0.00011	0.003722	9.9e-05	0.282816	9.52935e-05	0.00614868	0.282785	10.0204	3.3732	450
UN05R9.10	6.19	-1.6091	-1.455	1.46727	0.0001	0.000826	1.4e-05	0.282447	8.29564e-05	0.000595517	0.282438	0.0790763	2.93717	553.17
UN05R10.1	6.103	-1.6072	-1.454	1.46728	8.7e-05	0.002003	6.7e-05	0.281724	9.90893e-05	0.0030172	0.281652	2.89397	3.51917	1902.5
UN05R10.2	8.55	-1.6069	-1.498	1.46723	7.7e-05	0.001224	4.8e-05	0.281491	6.44699e-05	0.00199373	0.281448	-5.64496	2.28936	1845.6
UN05R10.3	7.01	-1.6145	-1.477	1.46737	7.6e-05	0.001275	2.4e-05	0.281994	8.01262e-05	0.00210351	0.281958	4.19546	2.84297	1485.8
UN05R10.4	8.3	-1.6092	-1.437	1.46737	8.4e-05	0.001295	3.1e-05	0.281581	7.0837e-05	0.00194168	0.281533	-0.276353	2.51605	1947.5
UN05R10.5	6.835	-1.6096	-1.411	1.46726	9.1e-05	0.000904	4.8e-05	0.28185	6.53865e-05	0.00181841	0.281819	6.56131	2.32168	1803.7
UN05R10.7	6.33	-1.597	-1.46	1.46728	8.7e-05	0.00105	1.5e-05	0.282077	9.71837e-05	0.00101847	0.282058	-4.40896	3.444	951.8
UN05R10.9	6.33	-1.6064	-1.438	1.46731	8.9e-05	0.005141	1.4e-05	0.282767	8.20279e-05	0.00400142	0.282722	8.22687	2.90375	469.21
UN05R11.2	7.71	-1.6127	-1.405	1.46726	6.9e-05	0.000706	1.8e-06	0.282074	6.35976e-05	0.000429791	0.282056	4.29154	2.25575	1337.9
UN05R11.3	7.86	-1.5934	-1.458	1.46731	6.9e-05	0.0007623	3.8e-06	0.28089	6.44437e-05	0.000468259	0.280852	-8.53955	2.29262	2633.6
UN05R11.5	6.82	-1.6068	-1.6	1.46725	7.9e-05	0.00045018	8.5e-07	0.281542	7.91749e-05	0.000331218	0.281526	-2.45659	2.81165	1863.8
UN05R11.6	6.62	-1.5906	-1.483	1.46728	0.00011	0.003158	1.9e-05	0.282694	7.92159e-05	0.00160029	0.282666	6.34545	2.80423	473.4
UN05R11.7	7.11	-1.6049	-1.469	1.46724	8.2e-05	0.001956	4.5e-05	0.282805	8.10912e-05	0.000492108	0.282787	10.8296	2.87067	481.78
UN05R11.10	5.53	-1.6065	-1.58	1.46728	8.9e-05	0.0006945	2.1e-06	0.280752	7.82126e-05	0.000483392	0.280709	0.778535	2.78647	3244.5
UN03R1.7	6.98	-1.712	-1.49	1.46717	9e-05	0.001313	8.1e-05	0.281065	7.26566e-05	0.00165685	0.280997	-1.49808	2.58529	2713.6
UN03R2.1	8.04	-1.717	-1.602	1.46711	8.4e-05	0.001449	9.5e-05	0.281706	0.000100048	0.0038043	0.28166	-1.76605	3.55146	1687.8
UN03R2.2	6.66	-1.719	-1.529	1.46717	9.6e-05	0.014072	2.3e-05	0.2826	0.000172333	0.00765362	0.282473	-0.318534	6.10066	480.58
UN03R2.3-1	6.99	-1.724	-1.531	1.46705	0.00011	0.005526	3.2e-05	0.282693	8.39056e-05	0.00265122	0.282644	5.59959	2.97026	475.2
UN03R2.4	5.688	-1.7228	-1.508	1.4671	8.8e-05	0.00092	3.8e-05	0.281341	8.01032e-05	0.000772975	0.281303	-3.29855	2.84664	2170
UN03R2.6	9.37	-1.7358	-1.74	1.46717	0.0001	0.0003297	2.7e-06	0.280797	6.44397e-05	0.000143835	0.28078	-10.1864	2.29268	2671.8
UN03R2.8	7.05	-1.7391	-1.553	1.46705	9e-05	0.001468	2.1e-05	0.280936	7.45e-05	0.00164418	0.280858	-4.68132	2.65135	2789
UN03R2.9	7.05	-1.7214	-1.567	1.46718	7.5e-05	0.001241	1.1e-05	0.281718	6.26869e-05	0.00118237	0.281678	-0.625592	2.22534	1709.4
UN03R2.10	6.566	-1.722	-1.51	1.46702	0.00011	0.000901	3e-05	0.281118	7.82258e-05	0.0011984	0.281073	-1.52978	2.78268	2596.2
UN03R3.1-1	6.076	-1.7375	-1.5	1.46703	0.00013	0.00554	0.0002	0.28287	0.000133042	0.00480592	0.282821	11.7935	4.70965	471.6
UN03R3.3	6.16	-1.6212	-1.516	1.46724	8.3e-05	0.00112	1.6e-05	0.28206	7.36178e-05	0.00142219	0.282029	6.46835	2.61198	1475.7
UN03R3.4	6.9	-1.6203	-1.3	1.46723	7.4e-05	0.0001934	3e-06	0.281059	7.54317e-05	0.000146631	0.281049	1.93589	2.68446	2781.1
UN03R3.5	7.03	-1.6261	-1.44	1.46736	8.2e-05	0.000414	1.9e-05	0.28218	6.99447e-05	0.000307988	0.282172	0.0789317	2.47881	971.2
UN03R3.6	7.01	-1.626	-1.39	1.46745	0.00017	0.0004335	9.1e-06	0.28117	0.000113537	0.0003873	0.281147	4.29344	4.04007	2732.1
UN03R3.7	7.72	-1.6197	-1.4	1.46727	9.2e-05	0.000397	1e-05	0.281025	6.80717e-05	0.000322175	0.281004	-0.737892	2.42226	2734.7
UN03R3.8	6.41	-1.6175	-1.433	1.46733	8.3e-05	0.00532	0.00018	0.28286	0.000103924	0.00301767	0.282813	11.418	3.67883	466.81
UN03R3.10	7.559	-1.6158	-1.426	1.46729	6.5e-05	0.001214	2.9e-05	0.281949	7.26908e-05	0.00134021	0.281915	2.83179	2.5792	1493.6
UN03R4.1	6.45	-1.614	-1.489	1.46729	0.00013	0.00237	1.7e-05	0.2827	0.000103919	0.00264408	0.282679	6.8803	3.67876	476.99
UN03R4.3	6.67	-1.6132	-1.431	1.46722	7.8e-05	0.002871	1.4e-05	0.282792	7.54964e-05	0.00103449	0.282767	9.70814	2.67251	463.81
UN03R4.5	7.15	-1.6166	-1.37	1.4673	7.8e-05	0.000529	1.4e-05	0.282159	6.81186e-05	0.000901022	0.282146	5.99449	2.41575	1272.4
UN03R4.7	6.34	-1.639	-1.452	1.46734	9.7e-05	0.001094	3.4e-05	0.281642	9.81286e-05	0.00217976	0.281604	-0.917031	3.48431	1809.9
UN03R4.8	5.96	-1.6162	-1.454	1.46729	8.6e-05	0.003057	6e-05	0.282757	7.92181e-05	0.00579336	0.282731	8.3793	2.80424	462.21
UN03R4.9	6.69	-1.612	-1.431	1.46729	7.7e-05	0.00627	0.00018	0.282883	9.2435e-05	0.00261633	0.282826	12.2875	3.27228	485.97
UN03R5.2	5.64	-1.614	-1.441	1.46732	8.8e-05	0.002138	9e-05	0.28281	0.000113577	0.00106113	0.282792	10.3692	4.02045	454.2
UN03R5.4	5.95	-1.6271	-1.5	1.46727	9.1e-05	0.000755	2.5e-05	0.280687	9.42754e-05	0.000472481	0.280647	-13.4395	3.3547	2734.4
UN03R5.6	7.12	-1.6255	-1.442	1.46724	0.0001	0.000882	1.3e-05	0.282226	8.48323e-05	0.000258909	0.282211	-0.0549464	3.00597	904.9
UN03R5.7	7.36	-1.624	-1.49	1.46735	8.4e-05	0.000683	2e-05	0.281986	7.45397e-05	0.00125208	0.281969	1.11936	2.64384	1334.7
UN03R5.9	5.85	-1.6163	-1.46	1.46722	9.2e-05	0.0007895	5.1e-06	0.28104	8.29086e-05	0.000417045	0.280999	-1.1284	2.95016	2726.3
UN03R5.10	6.25	-1.6203	-1.454	1.46735	8.1e-05	0.005799	5.3e-05	0.282799	0.000101999	0.0033897	0.282747	9.32136	3.61079	478.19
UN03R6.2	6.86	-1.611	-1.38	1.46725	9.7e-05	0.0004745	6.2e-06	0.281542	7.54497e-05	0.000154362	0.281525	-1.62971	2.6796	1901.5
UN03R6.3	8.32	-1.6158	-1.482	1.46734	6.8e-05	0.001573	6.4e-05	0.281118	6.35553e-05	0.00265788	0.281033	2.18817	2.26198	2815.4
UN03R6.5	6.34	-1.6131	-1.41	1.4673	7.9e-05	0.0006504	8e-06	0.280846	7.35714e-05	0.000174292	0.28081	-4.48345	2.61879	2869
UN03R6.7	6.968	-1.6082	-1.48	1.46725	8.8e-05	0.000605	3e-05	0.280995	6.80704e-05	0.0011234	0.280962	-0.226158	2.42271	2819.9
UN03R6.8-1	5.261	-1.6163	-1.475	1.46719	0.0001	0.001712	4.4e-05	0.281619	9.14445e-05	0.00175163	0.281562	-3.69596	3.24656	1754.6
UN03R6.8-2	5.95	-1.614	-1.35	1.46719	0.00011	0.0005787	4.7e-06	0.281686	8.19907e-05	0.000502834	0.281667	0.0226223	2.91092	1754.6
UN03R7.1	6.79	-1.6234	-1.468	1.46727	8e-05	0.005089	5.3e-05	0.282728	8.57925e-05	0.00461798	0.282683	6.98786	3.03706	475.8
UN03R7.2	7.43	-1.6239	-1.48	1.46721	8.7e-05	0.000599	2.5e-05	0.281014	7.17335e-05	0.000806007	0.280982	0.443125	2.55307	2819.1
UN03R7.3	7.56	-1.6199	-1.59	1.46728	8.2e-05	0.0004576	5.2e-06	0.281463	7.35949e-05	0.000238062	0.281446	-3.36393	2.61401	1947.6
UN03R7.4	6.56	-1.6274	-1.508	1.46733	9.5e-05	0.000992	3.2e-05	0.281099	6.26591e-05	0.00154581	0.281047	0.701898	2.22964	2731
UN03R7.5	7.62	-1.625	-1.61	1.46717	8.4e-05	0.0002154	2e-06	0.280784	6.6245e-05	0.000121172	0.280773	-10.3431	2.35694	2676
UN03R7.8	5.748	-1.6129	-1.42	1.4673	0.0001	0.0007836	5.9e-06	0.281384	8.29203e-05	0.000608436	0.281355	-7.21419	2.94505	1920.3
UN03R7.10	6.79	-1.6216	-1.419	1.46728	9.3e-05	0.0008384	3.3e-06	0.281723	6.44801e-05	0.000400107	0.281697	-2.23496	2.28847	1608.9
UN03R7.11	6.6	-1.6161	-1.417	1.4673	8.1e-05	0.000975	1.6e-05	0.281858	7.361e-05	0.000362743	0.281826	5.11075	2.61323	1730
UN03R8.1	9.19	-1.6261	-1.403	1.46721	8.4e-05	0.000674	3.3e-05	0.28118	6.0882e-05	0.00145365	0.281145	4.13004	2.1664	2729
UN03R8.2	6.62	-1.626	-1.43	1.46731	9.5e-05	0.000669	2.3e-05	0.280919	9.14229e-05	0.000473027	0.280887	-11.0276	3.2512	2472.7
UN03R8.3	7.65	-1.634	-1.461	1.46733	9.7e-05	0.0018	4.4e-05	0.282833	7.64261e-05	0.000602861	0.282817	11.9215	2.70554	484.17
UN03R8.4	6.68	-1.6274	-1.46	1.46726	8.9e-05	0.0006113	2.6e-06	0.281848	7.17662e-05	0.000386526	0.281829	2.94077	2.54719	1630.8
UN03R8.6	6.6	-1.618	-1.45	1.46726	9.2e-05	0.000438	2.5e-05	0.281142	8.38535e-05	0.000502068	0.281119	2.52136	2.9836	2699
UN03R8.7	5.58	-1.6223	-1.449	1.46725	8.6e-05	0.003079	2e-05	0.282785	8.95805e-05	0.00264363	0.282758	9.43298	3.17109	465.61
UN03R8.10	7.59	-1.6179	-1.47	1.46729	7.7e-05	0.0007004	3.3e-06	0.281857	6.99316e-05	0.000503737	0.281835	3.01632	2.48204	1624.3
UN03R9.3-1	6.62	-1.6368	-1.46	1.46726	8.6e-05	0.000715	1.7e-05	0.282449	7.73419e-05	0.00104505	0.282441	1.84582	2.73885	628.46
UN03R9.4	7.44	-1.6266	-1.45	1.46725	8.2e-05	0.000575	1.3e-05	0.281693	7.6384e-05	0.000743275	0.281672	4.77824	2.7131	1953.2
UN03R10.2	6.732	-1.6314	-1.47	1.46721	7.9e-05	0.000785	2.9e-05	0.281672	6.62827e-05	0.000821775	0.281644	2.34972	2.35397	1890.9
UN03R10.5	6.83	-1.6244	-1.38	1.46722	8.7e-05	0.000663	1.5e-05	0.281503	7.35965e-05	0.000350545	0.281479	-3.85827	2.61362	1874.9
UN03R10.6	8.08	-1.6284	-1.29	1.46719	8.1e-05	0.0001769	9.6e-06	0.281126	6.26603e-05	0.000170741	0.281117	1.82046	2.22938	2672.8
UN03R10.7	5.77	-1.6149	-1.474	1.46721	0.0001	0.002697	1e-05	0.282692	7.82825e-05	0.00255634	0.282669	5.9763	2.77106	451.9
* 176Yb/177Hf = (176Yb/173Yb)true x (173Yb/177Hf)measured x (m173(Yb)/m177(Hf))b(Hf), b(Hf) = ln(179Hf/177Hf true / 179Hf/177Hfmeasured )/ ln (m179(Hf)/m177(Hf) );
where m is the atomic mass of the respective isotope.
*Initial 176Hf/177Hf and eHf calculated using the 207Pb/206Pb ages of respective zircon domains, and the CHUR parameters:
176Lu/177Hf = 0.0336, and 176Hf/177Hf = 0.282785 (Bouvier et al., 2008).
